# Supplementary material for: Uptake, Accuracy, Safety, and Linkage into Care over Two Years of Promoting Annual Self-Testing for HIV in Blantyre, Malawi: A Community-Based Prospective Study
Source: PLOS journal article supplement (doi:10.1371/journal.pmed.1001873), 2015-09-08
Supplement: S2 (10.1371/journal.pmed.1001873.s002) [file journal.pmed.1001873.s002]

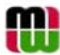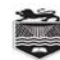

Gawo la wotenga mbali (Participant to fill this section)

If you tested together as a couple, you still need to complete this form individually

|                                                                                                                                                                                                                                                                                                                                                                            |                                                                                                                                                                                       |                                                                                                                                                                                                                                                                                                                                                                                                |                                                                             |                                                                               |                                                                                    |                                                                     |                                  |
|----------------------------------------------------------------------------------------------------------------------------------------------------------------------------------------------------------------------------------------------------------------------------------------------------------------------------------------------------------------------------|---------------------------------------------------------------------------------------------------------------------------------------------------------------------------------------|------------------------------------------------------------------------------------------------------------------------------------------------------------------------------------------------------------------------------------------------------------------------------------------------------------------------------------------------------------------------------------------------|-----------------------------------------------------------------------------|-------------------------------------------------------------------------------|------------------------------------------------------------------------------------|---------------------------------------------------------------------|----------------------------------|
| X01 AGE                                                                                                                                                                                                                                                                                                                                                                    | Kodi muli ndi zaka zingati? My age is                                                                                                                                                 | <input type="text"/>                                                                                                                                                                                                                                                                                                                                                                           | X02 SEX                                                                     | Ndine wa I am                                                                 | <input type="checkbox"/> Male (Mwamuna)<br><input type="checkbox"/> Female (mkazi) | X03 PID Self referral ID                                            | PLACE SELF REFERRAL BARCODE HERE |
| EXAMPLE: Wonetserani kwa otenga nawo mbali posankha yankho yolondola<br>Demonstrate to the participant by ticking the appropriate box                                                                                                                                                                                                                                      |                                                                                                                                                                                       | Nyengo ku Blantyre ili:<br>The weather in Blantyre is:                                                                                                                                                                                                                                                                                                                                         |                                                                             | <input type="checkbox"/> Bwino good<br>                                       | <input type="checkbox"/> Bwinobe somewhat good<br>                                 | <input type="checkbox"/> Siyilibwino konse<br>Siyilibwino konse<br> |                                  |
| X04 HIVTST                                                                                                                                                                                                                                                                                                                                                                 | Kodi munayamba mwayezetsapo kachilombo ka HIV?<br>Have you had an HIV test before?                                                                                                    | <input type="checkbox"/> Yes                                                                                                                                                                                                                                                                                                                                                                   |                                                                             | <input type="checkbox"/> No                                                   |                                                                                    |                                                                     |                                  |
| X05 TST                                                                                                                                                                                                                                                                                                                                                                    | Ndinayezetsa I last tested                                                                                                                                                            | <input type="checkbox"/> On my own (Ndekha)<br><input type="checkbox"/> with my partner (Ndi mkazi/mwamuna wanga)                                                                                                                                                                                                                                                                              |                                                                             |                                                                               |                                                                                    |                                                                     |                                  |
| X06 RES                                                                                                                                                                                                                                                                                                                                                                    | Ngati munayezetsa, zotsatira zake zinali: My last test result was                                                                                                                     | <input type="checkbox"/> Positive +                                                                                                                                                                                                                                                                                                                                                            | <input type="checkbox"/> Don't know ?                                       | <input type="checkbox"/> Negative —                                           |                                                                                    |                                                                     |                                  |
| X07 ART                                                                                                                                                                                                                                                                                                                                                                    | Muli pamankhwala a ARV? If HIV positive, are you on ART?                                                                                                                              | <input type="checkbox"/> Yes                                                                                                                                                                                                                                                                                                                                                                   | <input type="checkbox"/> No                                                 |                                                                               |                                                                                    |                                                                     |                                  |
| <p><u>Chidziwitso</u> : Zotsatira zanu za zoyezetsa za HIV sizikhala ndi dzina lanu komanso palibe munthu amene azaziwe zotsatirazo olo aphungu amene pokhapokha mutawauza zotsatirazo inu nokha.</p> <p><u>Important</u> : Your HIV result will not be linked to your name and no one including the counsellor will know your result unless you disclose it yourself.</p> |                                                                                                                                                                                       |                                                                                                                                                                                                                                                                                                                                                                                                |                                                                             |                                                                               |                                                                                    |                                                                     |                                  |
| X08 RESCOR                                                                                                                                                                                                                                                                                                                                                                 | Kodi mukukhulupilira kuti zotsatira zanu poziyeza nokha zinali zoona?<br>Do you trust your self test result were correct ?                                                            | <input type="checkbox"/> Ndizoona definitely correct<br>                                                                                                                                                                                                                                                                                                                                       | <input type="checkbox"/> Mwina ndizoona probably correct<br>                | <input type="checkbox"/> Sizooona Not correct<br>                             |                                                                                    |                                                                     |                                  |
| X09 RES                                                                                                                                                                                                                                                                                                                                                                    | Zotsatira zanga ndi zoti:<br>My self-test result is:                                                                                                                                  | <input type="checkbox"/> Ndilinako positive<br>+                                                                                                                                                                                                                                                                                                                                               | <input type="checkbox"/> Sindikudziwa not sure/invalid<br>?                 | <input type="checkbox"/> Ndilibe negative<br>—                                |                                                                                    |                                                                     |                                  |
| X10 TSTHRD                                                                                                                                                                                                                                                                                                                                                                 | Kunali kovuta bwanji kuti mudziyeze molondola?<br>How hard was it for you to do the self-test correctly?                                                                              | <input type="checkbox"/> Sikunali kovuta Not at all hard to do the test<br>                                                                                                                                                                                                                                                                                                                    | <input type="checkbox"/> Kunali kovutitapo somewhat hard to do the test<br> | <input type="checkbox"/> Kunali kovuta kwambiri. very hard to do the test<br> |                                                                                    |                                                                     |                                  |
| X11 SATIS                                                                                                                                                                                                                                                                                                                                                                  | Kodi ndinu wokhutitsidwa motani ndi ndondomeko yonse yoziyenza wekha? Overall, how satisfied were you with the self-testing process                                                   | <input type="checkbox"/> Wokhutitsidwa Very satisfied<br>                                                                                                                                                                                                                                                                                                                                      | <input type="checkbox"/> Wokhutitsidwa pang'ono Somewhat satisfied<br>      | <input type="checkbox"/> Wosakhutitsidwa Not satisfied<br>                    |                                                                                    |                                                                     |                                  |
| X12 RCMD                                                                                                                                                                                                                                                                                                                                                                   | Kodi mungawalimbikitse anzanu ndi ku banja kwanu kugwiritsa ntchito chipangizo choyezera cha mkamwachi? Would you recommend this HIV test kit for self-testing to friends and family? | <input type="checkbox"/> Kwambiri Definitely yes<br>                                                                                                                                                                                                                                                                                                                                           | <input type="checkbox"/> Kokayikitsa Not sure<br>                           | <input type="checkbox"/> Ayi Definately no<br>                                |                                                                                    |                                                                     |                                  |
| X13 OSPEC                                                                                                                                                                                                                                                                                                                                                                  | Ngati munakakamizidwa kuyezetsa, ndi ndani anakukamizani?<br>If forced to test, who forced you?                                                                                       | <input type="checkbox"/> Okondedwa/mamuna wanga/mkazi wanga (Husband/wife or spouse or partner)<br><input type="checkbox"/> Kholo/wondiyang'anira (Parent or Guardian)<br><input type="checkbox"/> Achibale ena (Other relative)<br><input type="checkbox"/> Mzanga/kapena ogwira naye ntchito (Friend or colleague)<br><input type="checkbox"/> Sindinachite kukakamizidwa (I was not forced) |                                                                             |                                                                               |                                                                                    |                                                                     |                                  |
| X14 INFL                                                                                                                                                                                                                                                                                                                                                                   | Ndikutiko mukufuna kuzakhale malo oyezetsera mtsogolo muno? Which would you want most to be your next test?                                                                           | <input type="checkbox"/> Malo oyezetsera magazi (VCT centre/hospital/clinic)<br><input type="checkbox"/> Kuyezetsa mothandizidwa ndi a phungu ku kunyumba (Testing by a counsellor at home)<br><input type="checkbox"/> Kuyezetsa pamaso pa a phungu (Self-testing in the presence of a counsellor)<br><input type="checkbox"/> Kuziyeza ndekha kunyumba (Self-testing at home in private)     |                                                                             |                                                                               |                                                                                    |                                                                     |                                  |

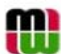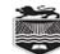

Gawo la wotenga mbali (Participant to fill this section) continues.....

X15 IMPRV **Ndichiyani chomwe mukuona ngati chingapangitse kuti ndondomeko yoziyeza wekha ikhale yopambana?**  
What would you recommend to improve the experience of self-testing?

-----

-----

-----

-----

-----

-----

-----

-----

|  |  |
|--|--|
|  |  |
|  |  |
|  |  |
|  |  |
|  |  |
|  |  |
|  |  |
|  |  |

The Community counsellor to fill this section if test kit seen  
(the counsellor will not read your result without your permission)

X16 KITSN Kit seen ☐ Yes  
☐ No

X17 RES Result ☐ Negative  
☐ Faint +ve  
☐ Clear +ve

X18 TSTREP Test repeated ☐ Yes  
☐ No

X19 REPRES If repeated, test result ☐ Negative  
☐ Faint +ve  
☐ Clear +ve  
☐ Not seen

For Lab Use

X20 TID Technician's ID   X21 DTEC Date form collected

d d m m m y y y y

X22 RES Lab ☐ R (clear)  
☐ R (faint)  
☐ Very faint if very faint specify the colour            
☐ NR  
☐ I

X23 KI Kit ID
